# Supplementary material
Source: PubMed Central journal article supplement (PMC4313417)
Supplement: Supp_Fig1.pdf [file Supp_Fig1.pdf]

## Supplementary Data

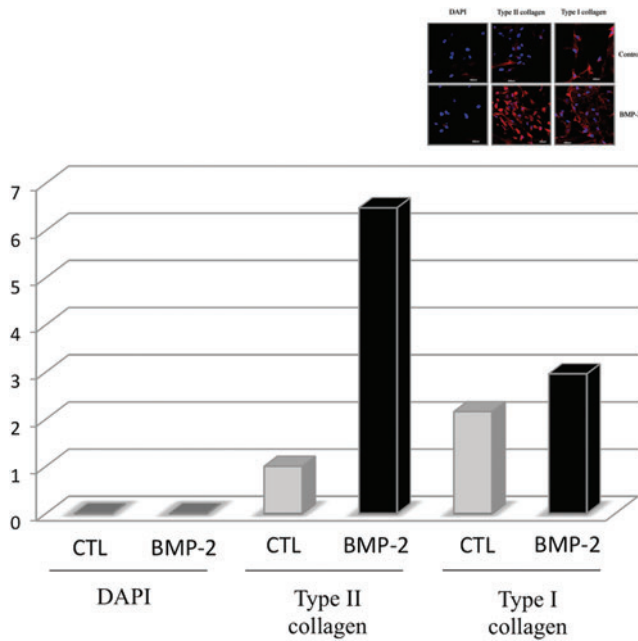

**SUPPLEMENTARY FIG. S1.** Quantification of the immunostaining in Figure 1B. HACs were cultured in type I collagen sponges for 7 days in hypoxia, in the absence (CTL), or in the presence of 50 ng/mL of BMP-2. Immunostaining was carried out to detect type I and type II collagens (red). The nuclei were counterstained with DAPI (blue). Red signals of images shown in Figure 1B were quantified using Image J software. HACs, human articular chondrocytes; BMP, bone morphogenetic proteins.
