# Supplementary material
Source: PubMed Central journal article supplement (PMC4313417)
Supplement: Supp_Fig3.pdf [file Supp_Fig3.pdf]

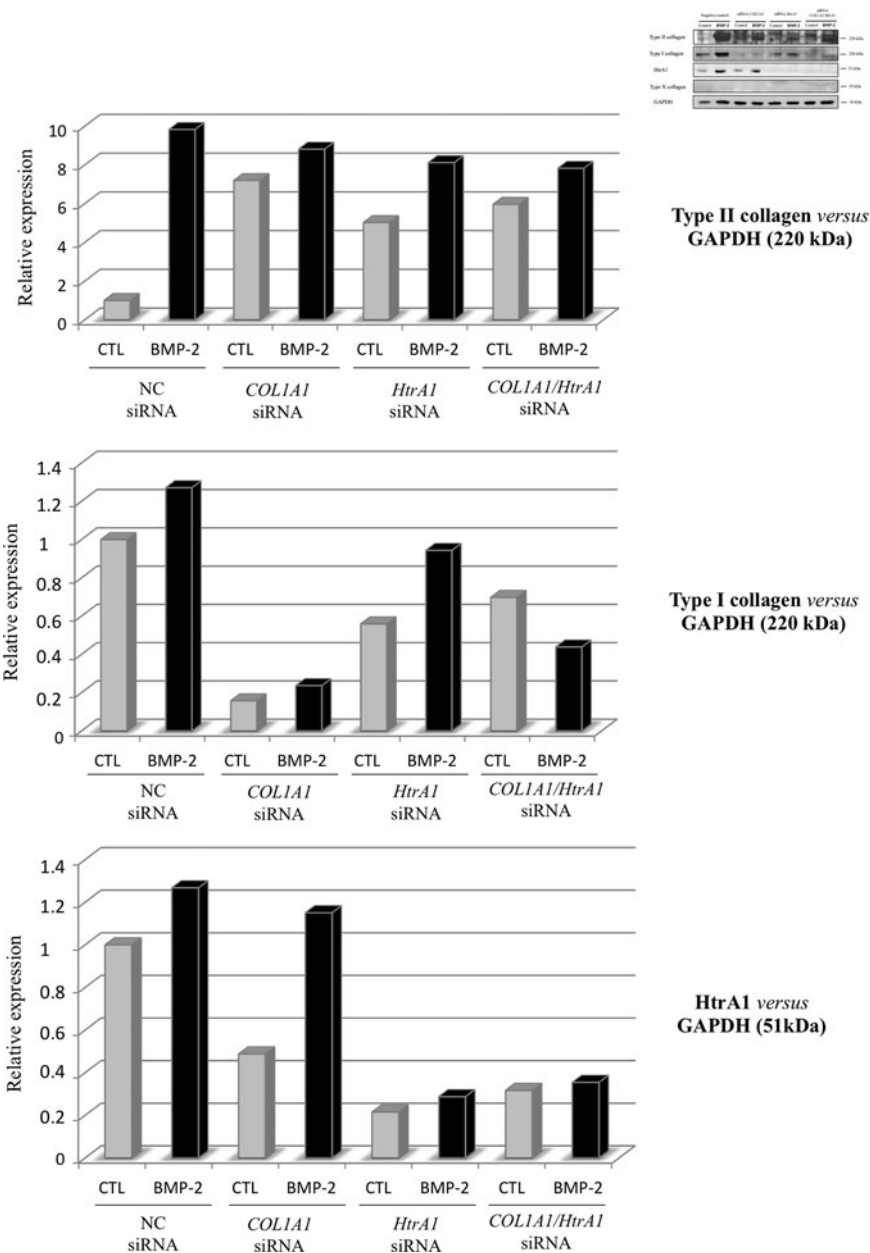

**SUPPLEMENTARY FIG. S3.** Quantification of the Western blot in Figure 4A. HACs seeded onto collagen sponges were transfected with an INTERFERin-siRNA complex (5 nM NC siRNA, or 5 nM *COL1A1* siRNA and/or 5 nM *HtrA1* siRNA) as described in the “Materials and Methods” section. HACs were then cultured in 3% O<sub>2</sub> for 7 days and treated with or without BMP-2 (50 ng/mL). Protein extracts were analyzed by Western blotting for type I, II, and X collagens, and HtrA1 versus GAPDH. Signals of the representative blots shown in Figure 4A were quantified with Image J software. Type II collagen, type I collagen, and HtrA1 expression was normalized to the GAPDH signal.
