# Supplementary material
Source: PubMed Central journal article supplement (PMC4313417)
Supplement: Supp_Fig4.pdf [file Supp_Fig4.pdf]

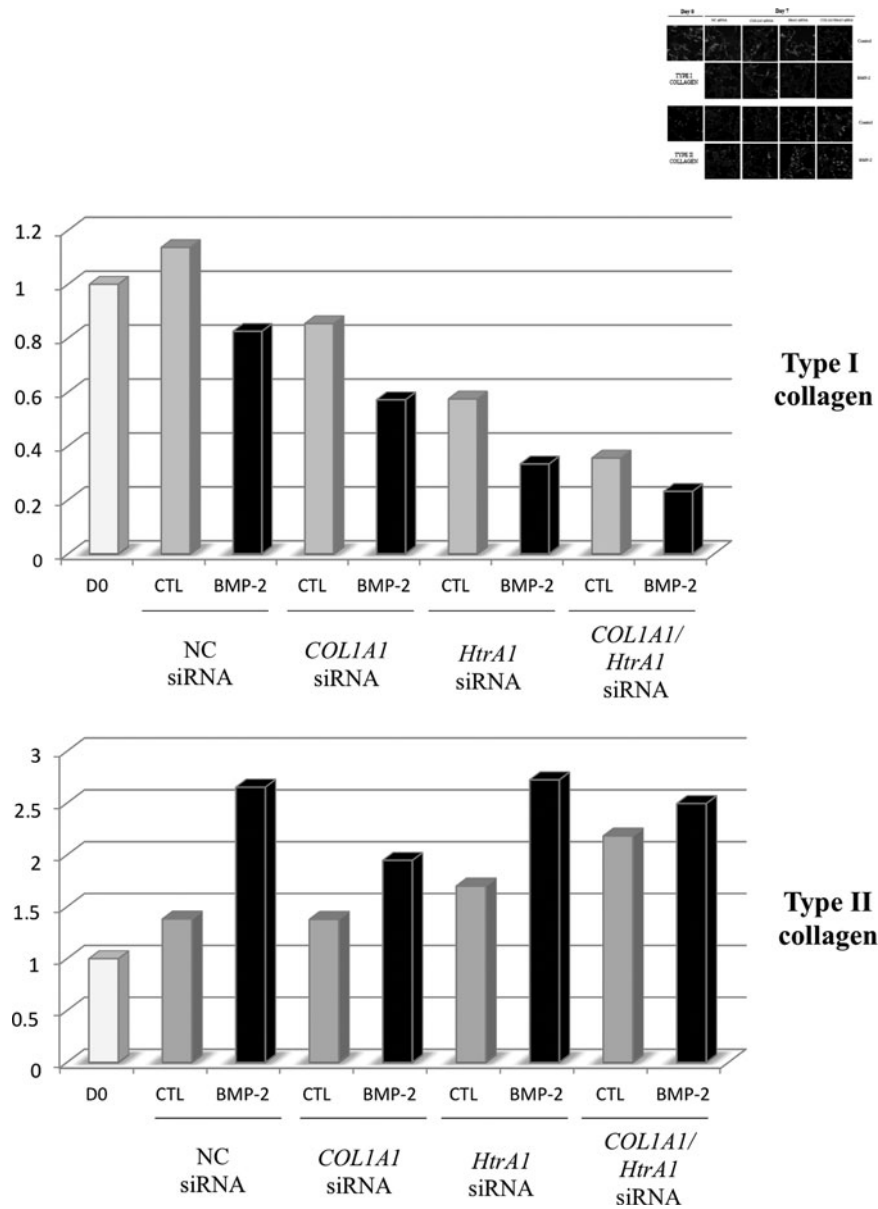

**SUPPLEMENTARY FIG. S4.** Quantification of the immunostaining in Figure 4B. HACs seeded onto collagen sponges were transfected with an INTERFERin-siRNA complex (50 nM NC siRNA, or 50 nM *COL1A1* siRNA and/or 50 nM *HtrA1* siRNA) as described in the “Materials and Methods” section. HACs were then cultured in 3% O<sub>2</sub> for 7 days and treated with or without BMP-2 (50 ng/mL). Immunostaining was carried out to detect type I and type II collagens (red). The nuclei were counterstained with DAPI (blue). Red signals of images shown in Figure 4B were quantified using Image J software.
