# Supplementary material
Source: PubMed Central journal article supplement (PMC4313417)
Supplement: Supp_Fig5.pdf [file Supp_Fig5.pdf]

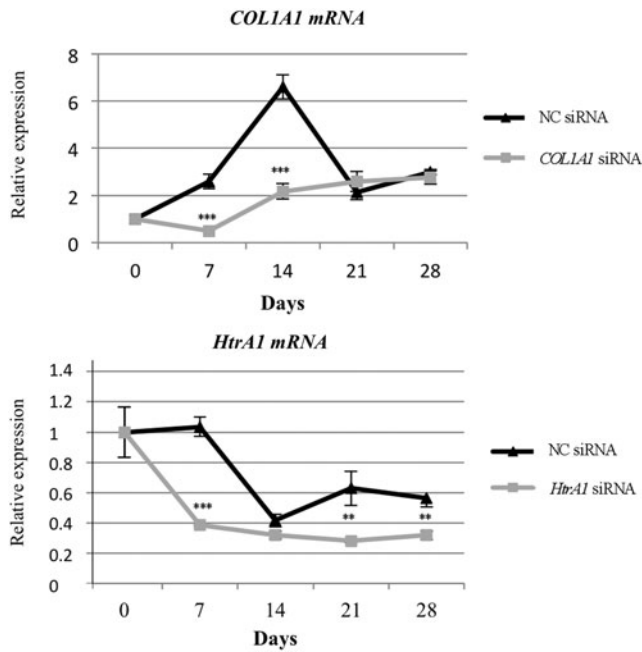

**SUPPLEMENTARY FIG. S5.** Kinetic study of siRNAs effects. HACs seeded onto collagen sponges were transfected with an INTERFERin-siRNA complex (50 nM NC siRNA, or 50 nM *COL1A1* siRNA and/or 50 nM *HtrA1* siRNA) as described in the “Materials and Methods” section. HACs were then cultured in hypoxia (3% O<sub>2</sub>) with culture arrest at day 0, 7, 14, 21, or 28. Relative mRNA expression of type I collagen and HtrA1 was obtained as described in Figure 1. Results of one representative experiment performed in triplicate were normalized to *RPL13a* mRNA and are presented as the relative expression of each gene. Statistically significant differences between NC siRNA and *COL1A1* or *HtrA1* siRNAs were determined at each time point using Student’s paired *t*-test \*\*\**p* < 0.001, and \*\**p* < 0.01.
